# Supplementary material
Source: Springer Nature journal article supplement (https://www.springermedizin.de/resource/supplementary/13075_2012_3753_MOESM1_ESM.pdf/9695250)

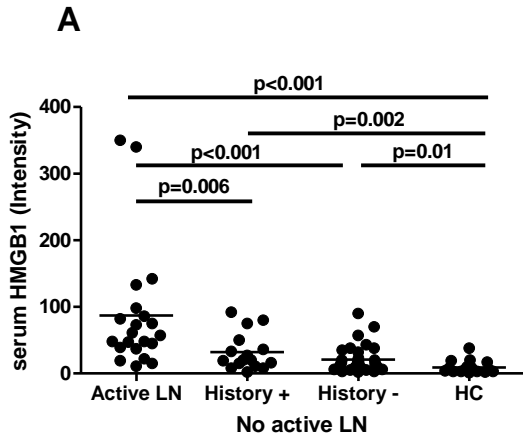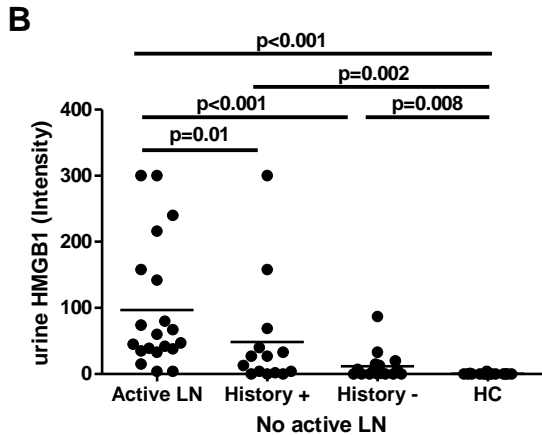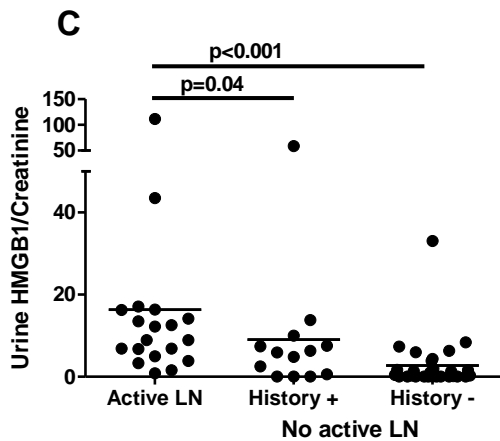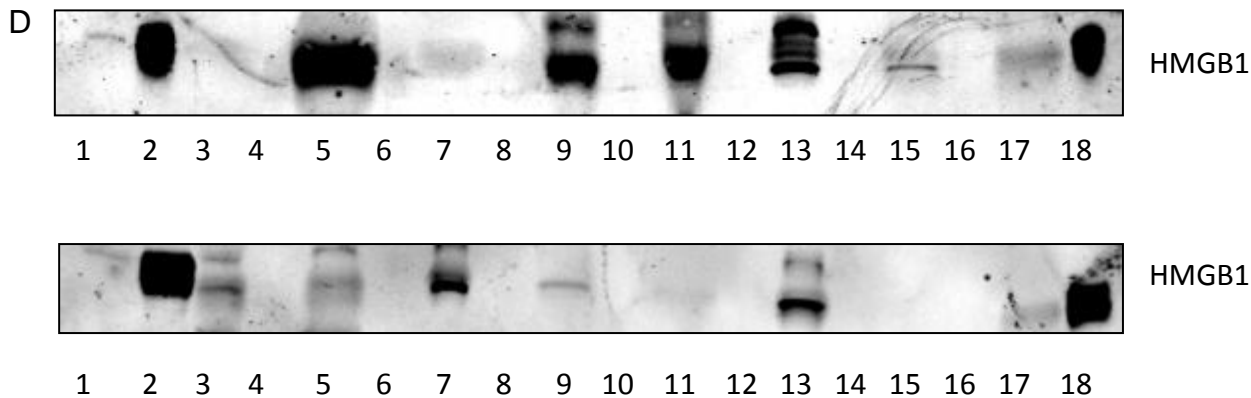

Supplement: MOESM1 [file 9695250]
